# Supplementary material for: Rapid Determination of Nutmeg Shell Content in Ground Nutmeg Using FT-NIR Spectroscopy and Machine Learning
Source: MDPI journal article supplement (doi:10.3390/foods12152939), 2023-08-02
Supplement: s1 [file s1]

# Rapid Determination of Nutmeg Shell Content in Ground Nutmeg using FT-NIR Spectroscopy and Machine Learning

Alissa Drees<sup>1,†</sup>, Bernadette Bockmayr<sup>2,†</sup>, Michael Bockmayr<sup>3,4</sup> and Markus Fischer<sup>1,5,\*</sup>

<sup>1</sup> Hamburg School of Food Science, Institute of Food Chemistry, University of Hamburg, Grindelallee 117, 20146 Hamburg, Germany; alissa.drees@uni-hamburg.de, markus.fischer@uni-hamburg.de

<sup>2</sup> Husarich GmbH, Peutestraße 53 D, 20539 Hamburg, Germany; b.bockmayr@husarich.com

<sup>3</sup> Department of Pediatric Hematology and Oncology, University Medical Center Hamburg-Eppendorf, Hamburg, Germany; m.bockmayr@uke.de

<sup>4</sup> Research Institute Children's Cancer Center Hamburg, Germany; m.bockmayr@uke.de

<sup>5</sup> Center for Hybrid Nanostructures (CHyN), Department of Physics, University of Hamburg, Luruper Chaussee 149, 22761 Hamburg, Germany; markus.fischer@uni-hamburg.de

\* Correspondence: markus.fischer@uni-hamburg.de; Tel.: +49 40 42838-4359

† These authors contributed equally to this work.

## - Supplementary material -

**Table S1:** Overview of all analyzed nutmeg and shell samples with corresponding harvest year. All samples were harvested in Indonesia.

| Sample ID | Type   | Production year | Sample ID | Type         | Production year |
|-----------|--------|-----------------|-----------|--------------|-----------------|
| 1         | Nutmeg | 2015            | 24        | Nutmeg       | 2021            |
| 2         | Nutmeg | 2015            | 25        | Nutmeg       | 2021            |
| 3         | Nutmeg | 2016            | 26        | Nutmeg       | 2021            |
| 4         | Nutmeg | 2016            | 27        | Nutmeg       | 2021            |
| 5         | Nutmeg | 2016            | 28        | Nutmeg       | 2021            |
| 6         | Nutmeg | 2016            | 29        | Nutmeg       | 2021            |
| 7         | Nutmeg | 2017            | 30        | Nutmeg       | 2021            |
| 8         | Nutmeg | 2017            | 31        | Nutmeg       | 2021            |
| 9         | Nutmeg | 2017            | 32        | Nutmeg       | 2021            |
| 10        | Nutmeg | 2017            | 33        | Nutmeg       | 2021            |
| 11        | Nutmeg | 2017            | 34        | Nutmeg       | 2021            |
| 12        | Nutmeg | 2017            | 35        | Nutmeg       | 2021            |
| 13        | Nutmeg | 2017            | 36        | Nutmeg       | 2021            |
| 14        | Nutmeg | 2017            | 37        | Nutmeg shell | 2016            |
| 15        | Nutmeg | 2017            | 38        | Nutmeg shell | 2016            |
| 16        | Nutmeg | 2017            | 39        | Nutmeg shell | 2017            |
| 17        | Nutmeg | 2017            | 40        | Nutmeg shell | 2017            |
| 18        | Nutmeg | 2017            | 41        | Nutmeg shell | 2017            |
| 19        | Nutmeg | 2017            | 42        | Nutmeg shell | 2017            |
| 20        | Nutmeg | 2017            | 43        | Nutmeg shell | 2020            |
| 21        | Nutmeg | 2020            | 44        | Nutmeg shell | 2020            |
| 22        | Nutmeg | 2020            | 45        | Nutmeg shell | 2021            |
| 23        | Nutmeg | 2020            | 46        | Nutmeg shell | 2021            |

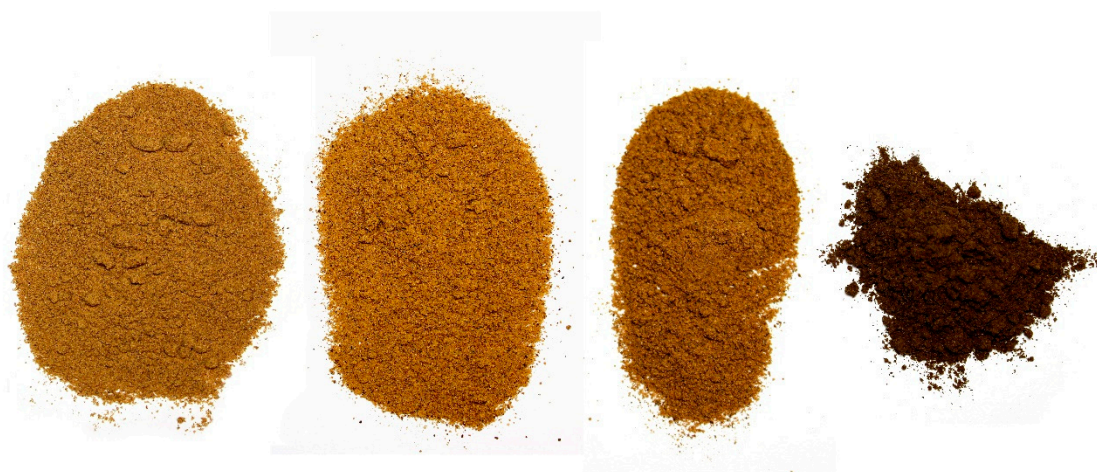

**Figure S1:** From left to right: Photographs of a nutmeg sample (ID 26), a mixture with 10% nutmeg shell, a mixture with 20% nutmeg shell, and a nutmeg shell sample (ID 39).

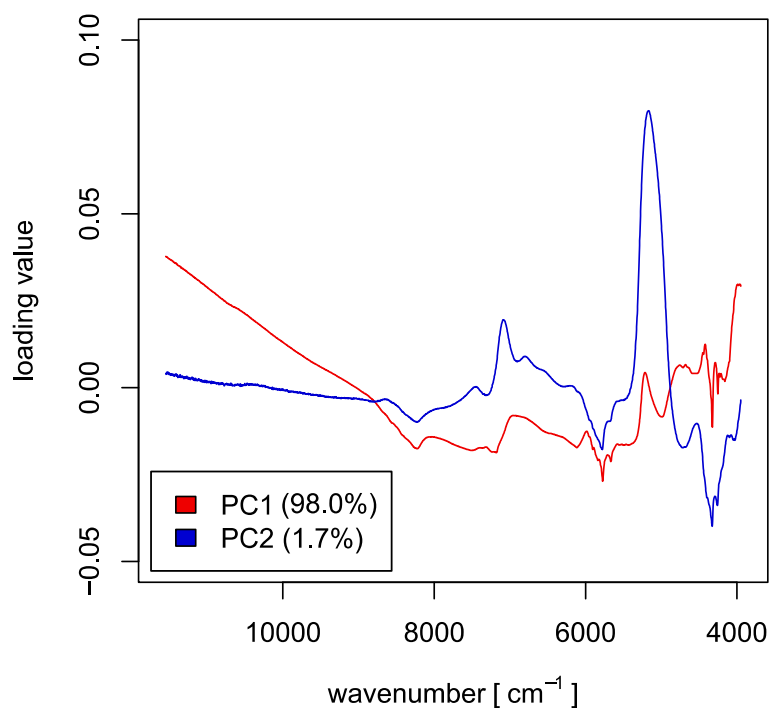

**Figure S2:** PCA loadings plot based on MSC corrected data.

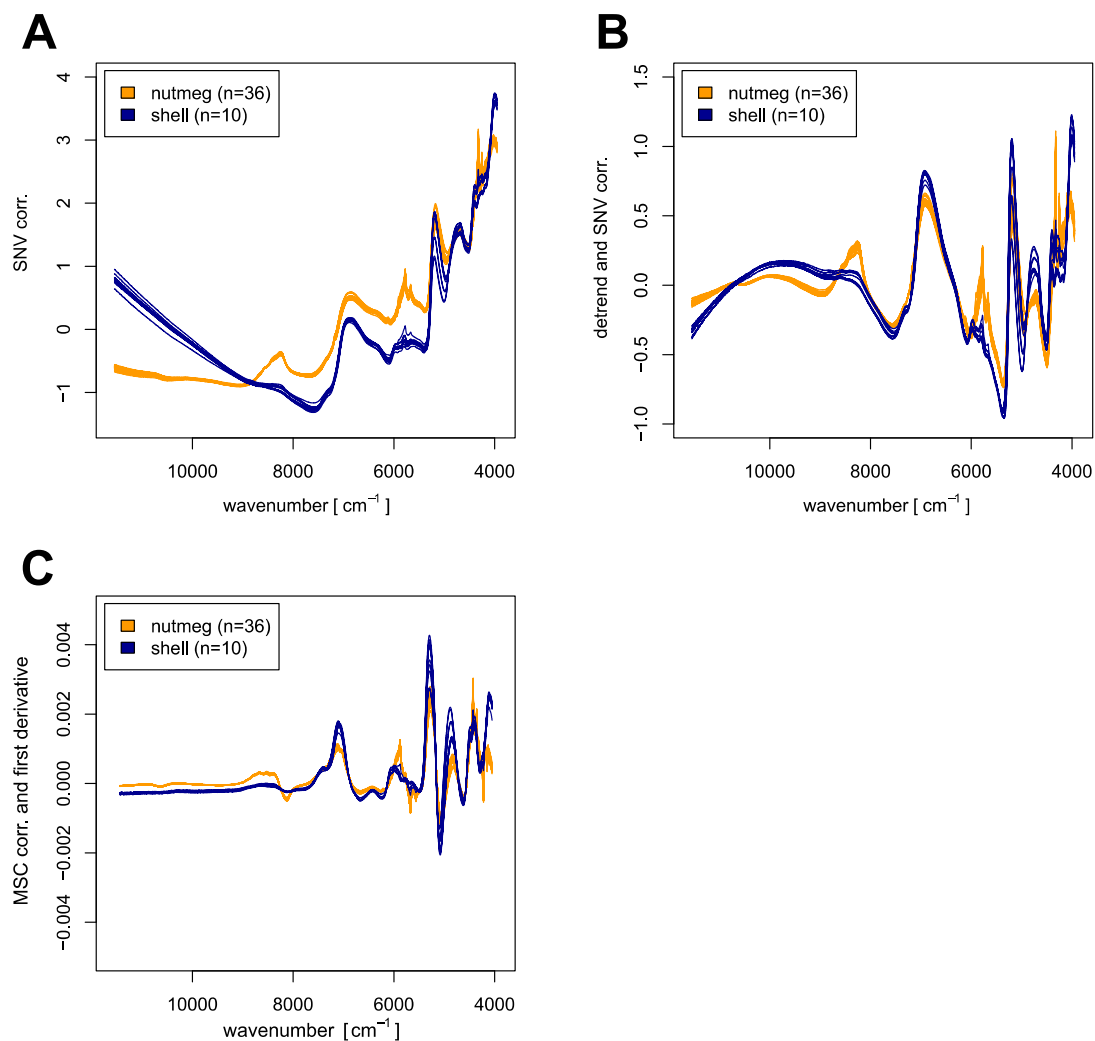

**Figure S3:** NIR spectra of nutmeg and nutmeg shell applying different pre-processing methods: **A** SNV treated data; **B** detrend and SNV treated data; **C** MSC correction combined with first derivative.

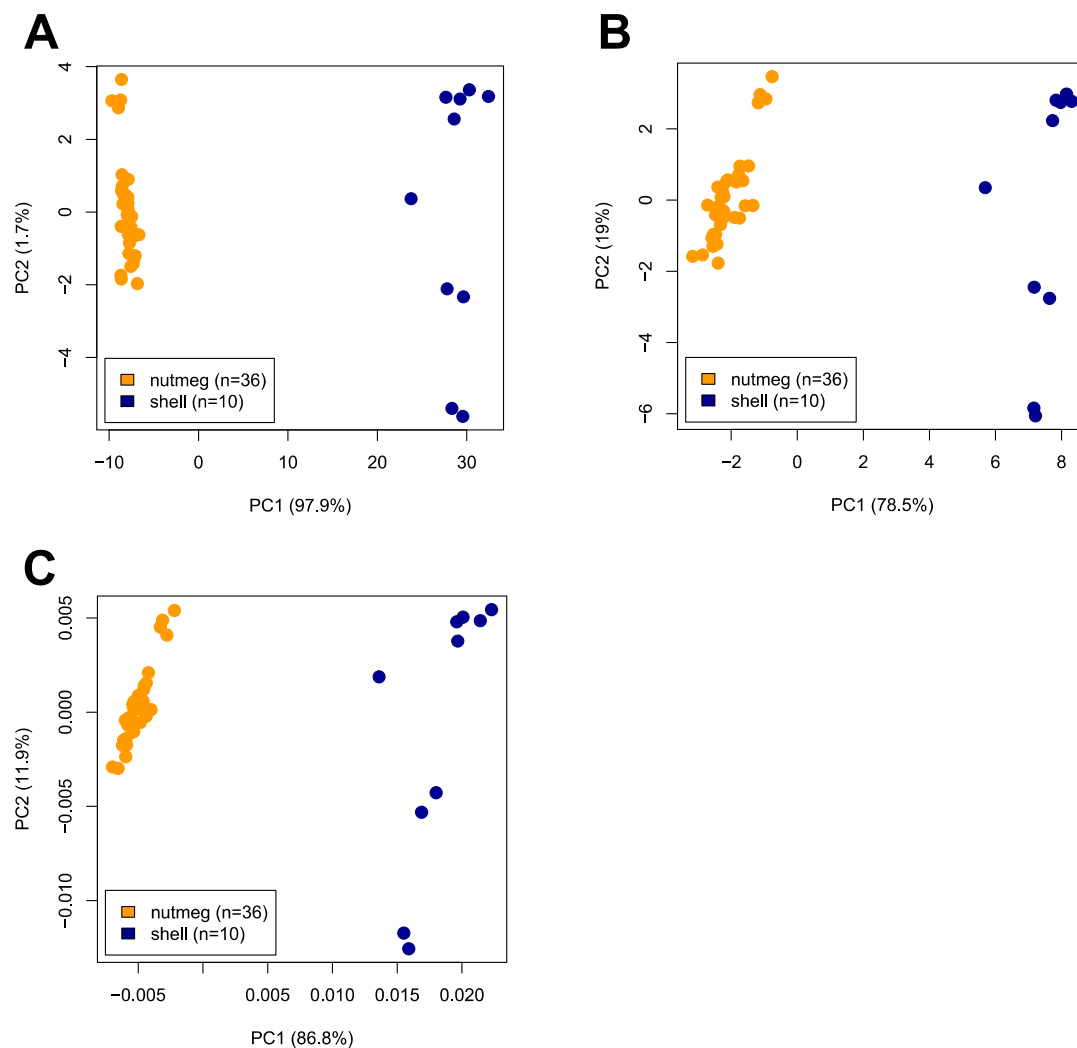

**Figure S4:** PCA scores plots based on different pre-processing methods: **A** SNV treated data; **B** detrend and SNV treated data; **C** MSC correction combined with first derivative.

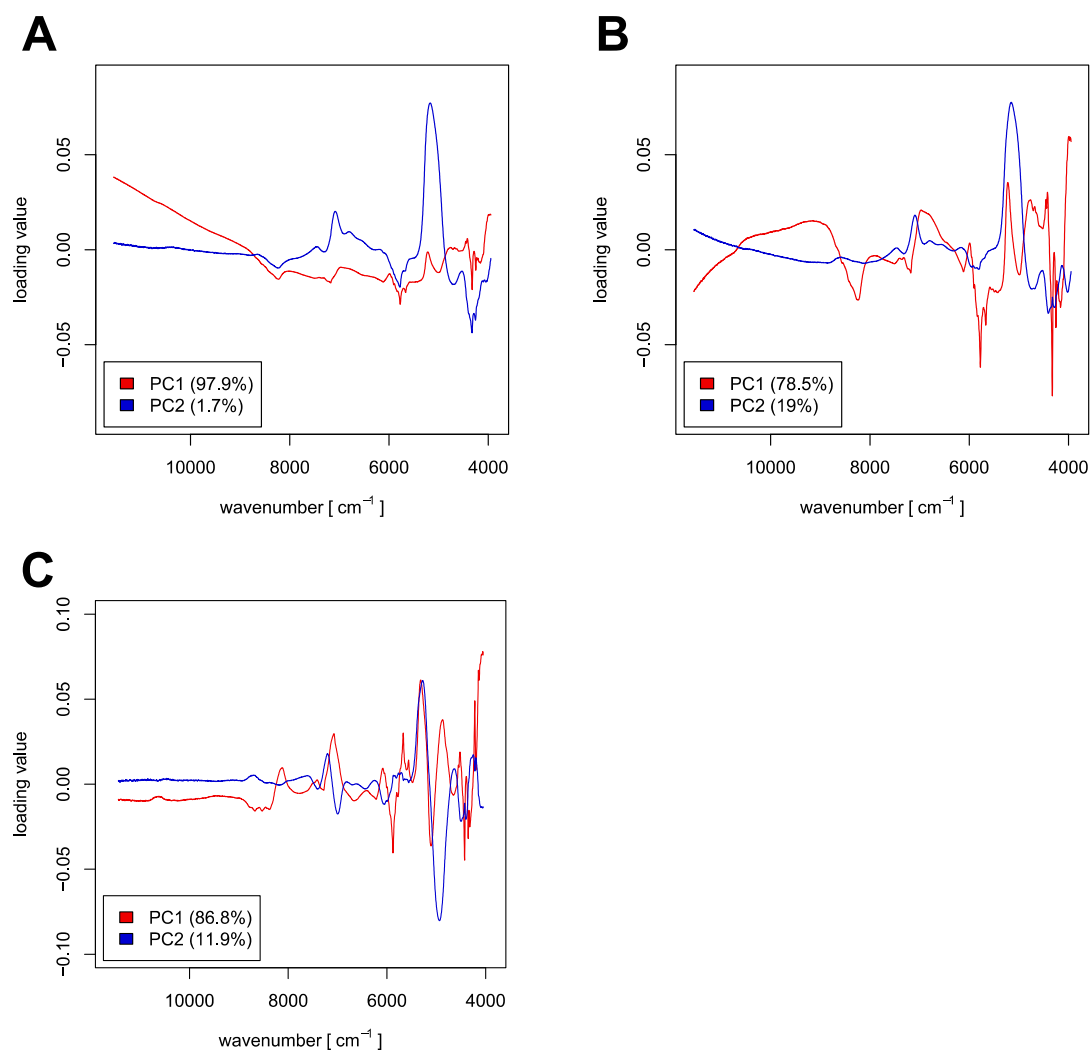

**Figure S5:** PCA loadings plots based on different pre-processing methods: **A** SNV treated data; **B** detrend and SNV treated data; **C** MSC correction combined with first derivative.

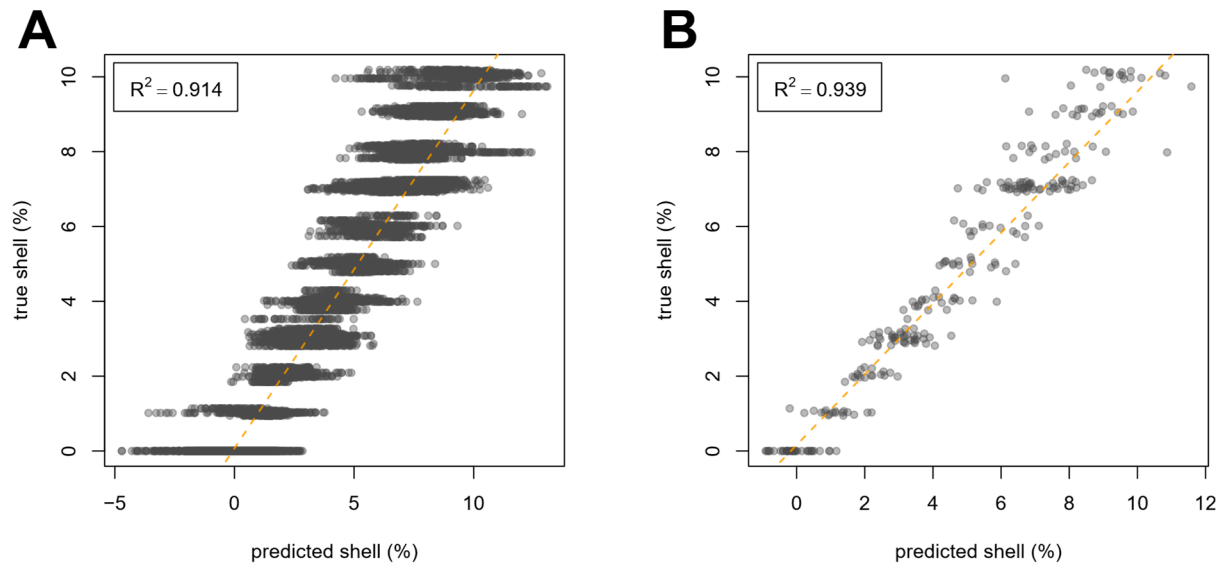

**Figure S6:** **A** Scatter plot of predicted vs. true nutmeg shell percentage in nutmeg samples based on 100-fold repeated PLS prediction; **B** Scatter plot of predicted vs. true shell percentage in nutmeg samples based on the average of 100-fold repeated PLS prediction.
